# Supplementary material for: Impact of Ascorbate—Glutathione Cycle Components on the Effectiveness of Embryogenesis Induction in Isolated Microspore Cultures of Barley and Triticale
Source: MDPI journal article supplement (doi:10.3390/antiox10081254), 2021-08-05
Supplement: s1 [file s1]

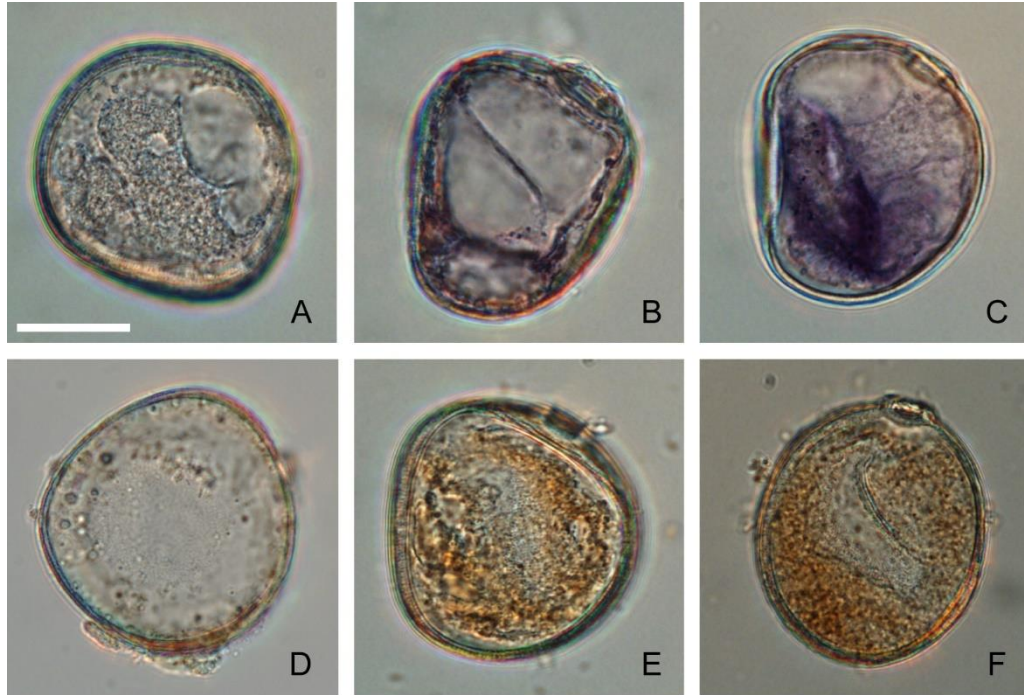

**Figure S1.** *In situ* histochemical detection of superoxide anion (A,B,C) and hydrogen peroxide (D,E,F) in randomly selected samples of isolated microspores at the early stages of microspore embryogenesis. Variation in patterns of superoxide anion and hydrogen peroxide distribution in the cytoplasm revealed by NBT (B,C) and DAB staining (E,F) in triticales microspores (DH28) induced to sporophytic development by low temperature tillers pre-treatment (LT; control). Negative controls for NBT (A) and DAB (D) staining. Blue staining demonstrates the spatial distribution of superoxide anions. Reddish-brown staining demonstrates the spatial distribution of hydrogen peroxide. Bar: 20  $\mu$ m.
